# Supplementary material for: Genomic analysis on pygmy hog reveals extensive interbreeding during wild boar expansion
Source: PubMed Central journal article supplement (PMC6491599; doi:10.1038/s41467-019-10017-2), 2019-04-30
Supplement: 41467_2019_10017_MOESM3_ESM.pdf [file 41467_2019_10017_MOESM3_ESM.pdf]

## **Description of Additional Supplementary Files**

File Name: Supplementary Data 1

Description: Sample information, sequencing and mapping statistics.

File Name: Supplementary Data 2

Description: Results from whole genome D-statistics analysis.

File Name: Supplementary Data 3

Description: Numbers of chromosomal segments and sites, and median length of segments supporting alternative rooted topologies identified by saguaro.

File Name: Supplementary Data 4

Description: Main set of parameter estimates in the G-PhoCS analysis.

File Name: Supplementary Data 5

Description: Genes with introgression signal and its corresponding functional pathway category.
